# Supplementary material for: An Exercise Program Designed for Children with Attention Deficit/Hyperactivity Disorder for Use in School Physical Education: Feasibility and Utility
Source: MDPI journal article supplement (doi:10.3390/healthcare7030102), 2019-09-04
Supplement: s1 [file s1]

## Supplementary Materials

| ID                    | Sex | Age | Year | ADHDControl             | TDPbase | TDP6 | TDP11 | PDPbase | PDP6 | PDP11 |
|-----------------------|-----|-----|------|-------------------------|---------|------|-------|---------|------|-------|
| 1                     | 1   | 11  | 6    | 1                       | 26      | 17   | 13    | 17      | 0    | 0     |
| 2                     | 2   | 10  | 5    | 0                       | 0       | 0    |       | 0       |      |       |
| 3                     | 1   | 11  | 6    | 1                       | 12      | 10   | 8     | 8       | 5    | 0     |
| 4                     | 1   | 10  | 5    | 1                       | 11      | 12   | 6     | 10      | 1    | 2     |
| 5                     | 1   | 10  | 5    | 1                       | 14      | 10   | 4     | 8       | 3    | 5     |
| 6                     | 1   | 10  | 5    | 0                       | 1       | 2    | 1     | 1       | 0    | 0     |
| 7                     | 2   | 10  | 5    | 0                       | 0       | 0    |       | 0       | 0    |       |
| 8                     | 2   | 10  | 5    | 1                       | 19      | 12   | 8     | 12      | 12   | 26    |
| 9                     | 1   | 10  | 5    | 0                       | 0       | 0    |       | 0       |      |       |
| 10                    | 1   | 10  | 5    | 1                       | 11      | 8    | 8     | 8       | 11   | 6     |
| 11                    | 1   | 11  | 6    | 0                       | 0       | 1    |       | 0       | 2    |       |
| 12                    | 2   | 10  | 5    | 0                       | 1       | 2    |       | 0       | 0    |       |
| Male 1<br>Female<br>2 |     |     |      | ADHD 1<br><br>Control 2 |         |      |       |         |      |       |

**Figure S1.** Details of Exercise Activities.

### Hot Seat

- Children form a single file line approximately 3 meters in front of a basketball net mounted on a wall
- The front person attempts to shoot the basketball in the net
- Once he/she has had an attempt he/she sprints to a point 20 meters away and attempts to get back in line before it is his/her turn again
- This is repeated continuously with each child keeping their own score of balls they have successfully got in the net: the challenge is to beat their own previous top score

### Circuit training

- Exercise stations were set up to include gymnasium equipment such as ropes and ladders. These were:
  - Bench bunny hops
  - Star-jumps
  - Up and over ladder climbs
  - Sit-ups
  - Mat drags
  - Squat thrusts
  - Upper body rope pulls
  - Vault jumps
- Each station lasted 40 seconds and they moved around the circuit clockwise without rest until all stations were completed by each individual

### Outdoors Agility Course

- Children complete the school's mini adventure playground without allowing any of their body parts to touch the floor
- 50-meter sprint
- Crawl under a large fabric "parachute"

- 30-meter sprint
- 3x shuttle runs collecting a rubber ring at each point
- 50-meter sprint
- 10 sit-ups, 10 star-jumps
- 30-meter sprint
- 10 burpees, 10 alternate leg squat thrusts
- 50-meter sprint to finish line
